# Supplementary material for: Plasma membrane receptor-like kinase leaf panicle 2 acts downstream of the DROUGHT AND SALT TOLERANCE transcription factor to regulate drought sensitivity in rice
Source: PubMed Central journal article supplement (PMC4265162; doi:10.1093/jxb/eru417), 2014-11-10
Supplement: supp_eru417_jexbot134163_file001.pdf [file supp_eru417_jexbot134163_file001.pdf]

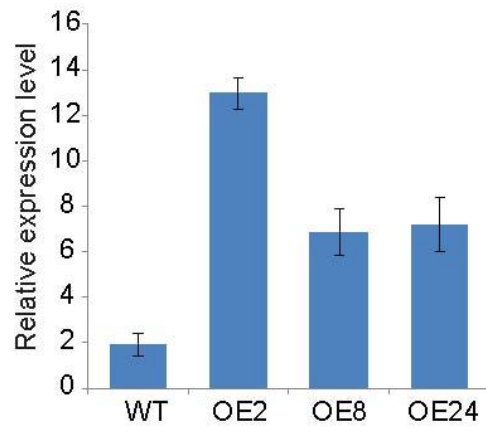

**Figure S1** Expression levels of the *LP2* gene in WT and transgenic lines.

**Table S1.** Primers used in this study

| <b>Prime name</b> | <b>Prime sequence (5'-3')</b>                   | <b>Description</b>           |                         |
|-------------------|-------------------------------------------------|------------------------------|-------------------------|
| LP2-over- F       | TCTGCACTAGGTACCTGCAG<br>ATGGGCCTCACGTGTGATACAC  | LP2 overexpression           |                         |
| LP2-over- R       | ATGGATCCGTCGACCTGCAG<br>TGCATCTTGTTTCATTACATGCC |                              |                         |
| DST-ov-F          | TCTGCACTAGGTACCTGCAG<br>ATGGACTCCCCGTCGCCTATGG  | DST overexpression           |                         |
| DST-ov-R          | ATGGATCCGTCGACCTGCAG<br>GAGGCTCAAGTTGAGGTCGA    |                              |                         |
| LP2-580-F         | CGGTCCCGGGGGATCCATGGGCCTCACGTG<br>TGATA         | LP2 subcellular localization |                         |
| LP2-580-R         | TGCTCACCATGGATCCTGCATCTTGTTTCATT<br>ACATGCC     |                              |                         |
| LRR-k-F:          | TCGCGGATCCGAATTCGGTGAGAATTCCT<br>TAAAGTC        | Protein expression in E.Coli |                         |
| LRR-k-R:          | GACGGAGCTCGAATTCTCAACCATATTTCTT<br>AGCTTCCAATC  |                              |                         |
| CHIP-F1           | AGGTGATGTTTCGAATCTATACCAA                       | CHIP-qPCR                    |                         |
| CHIP-R1           | GTGCCATGACGACGATGTGT                            |                              |                         |
| CHIP-F2           | TGTGATGAACTACGCCAAGACTATG                       |                              |                         |
| CHIP-R2           | CCCAATGAACAGGTCGAAAGC                           |                              |                         |
| CHIP-F3           | GAACGAGAATCTTGAAAGGTAACC                        |                              |                         |
| CHIP-R3           | CCGGAACCGGACAGAGAAAT                            |                              |                         |
| CHIP-F4           | CCGAAGGTGCTCCATTCTCT                            |                              |                         |
| CHIP-R4           | AATATTCGCACTTCACTTTGAGC                         |                              |                         |
| PB42AD-DST-F      | TGCCTCTCCCGAATTCATGGACTCCCCGTC<br>GCCTATGG      |                              | Yeast one-hybrid assays |
| PB42AD-DST-R      | CGAGTCGGCCGAATTCCTAGAGGCTCAAGT<br>TGAGGTCGA     |                              |                         |
| PLaczi –LRR-F     | ATCTGTCGACCTCGAGCTTGGTCTAATTTT<br>TTTTTTGCTAC   |                              |                         |
| PLaczi –LRR-R     | GAGCACATGCCTCGAGGTTACCTGCAAAA<br>ATATAACAACC    |                              |                         |
| qLP2-F            | ATGGGCCTCACGTGTGATAC                            | LP2 qPCR                     |                         |
| qLP2-R            | CAAGAAGGGCATCACCAACG                            |                              |                         |
